# Supplementary material
Source: PubMed Central journal article supplement (PMC4337232)
Supplement: NIHMS579105-supplement-05.pdf [file NIHMS579105-supplement-05.pdf]

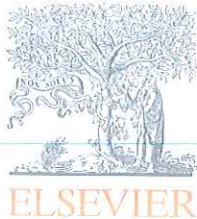

*Neurotoxicology and Teratology*  
Conflict of Interest Policy

Manuscript number (if applicable):

Article Title: Reactivity and Regulation of Motor Responses in Cocaine-Exposed Infants

Author name:

CHARLES R. BAUER

**Declarations**

*Neurotoxicology and Teratology* requires that all authors sign a declaration of conflicting interests. If you have nothing to declare in any of these categories then this should be stated.

**Conflict of Interest**

A conflicting interest exists when professional judgement concerning a primary interest (such as patient's welfare or the validity of research) may be influenced by a secondary interest (such as financial gain or personal rivalry). It may arise for the authors when they have financial interest that may influence their interpretation of their results or those of others. Examples of potential conflicts of interest include employment, consultancies, stock ownership, honoraria, paid expert testimony, patent applications/registrations, and grants or other funding.

**Please state any competing interests**

I have no conflicts of interests to declare.

**Funding Source**

All sources of funding should also be acknowledged and you should declare any involvement of study sponsors in the study design; collection, analysis and interpretation of data; the writing of the manuscript; the decision to submit the manuscript for publication. If the study sponsors had no such involvement, this should be stated.

**Please state any sources of funding for your research**

This research was supported by the National Institute on Child Health and Human Development through cooperative agreements (U10 HD 27904; U10 HD 21397; U10 HD 21385; U10 HD 27856; U10 HD 19897) NICHD contract HD23159, Intra-agency agreements with the National Institute on Drug Abuse (NIDA), Administration for Youth and Families (ACYF) and the Center for Substance Abuse Treatment (CSAT), and a New Faculty Research Fellowship from the College of Health and Human Services at Missouri State University.

The funding sources listed above were not involved in the study design, collection, analysis and interpretation of data, the writing of the manuscript, or the decision to submit the manuscript for publication.

**Signature** (a scanned signature is acceptable, but each author must sign)

**Print name**

CHARLES R. BAUER
